# Supplementary material
Source: publisher site journal article supplement (https://www.spandidos-publications.com/8074/downloadSupplementary)
Supplement: Supplementary file 1 [file downloadSupplementary]

Table SI. siRNA sequence for PTPN18.

| Gene name   | Sequence (5'-3')      |
|-------------|-----------------------|
| si-PTPN18-1 | GCGACUACAUUAAUGGCAATT |
|             | UUGCCAUUAAUGUAGUCGUTT |
| si-PTPN18-2 | GGACCCUCAAGGUCACAUUTT |
|             | AAUGUGACCUUGAGGGUCCTT |
| si-PTPN18-3 | CCUGUGCACCGUGGAUUAUTT |
|             | AUAAUCCACGGUGCACAGGTT |
| si-NC       | UUCUCCGAACGUGUCACGUTT |
|             | ACGUGACACGUUCGGAGAATT |

siRNA, small interfering RNA; NC, negative control.

Table SII. Antibodies used in this study.

| Antibody name             | Catalog number | Dilutions                | Supplier                        |
|---------------------------|----------------|--------------------------|---------------------------------|
| PTPN18                    | 8311           | IP/WB<br>(1:200/1:1,000) | Cell Signaling Technology, Inc. |
| $\beta$ -Actin            | 4970           | WB (1:1,000)             | Cell Signaling Technology, Inc. |
| HA                        | abs830006      | IP/WB<br>(1:200/1:1,000) | Absin Bioscience, Inc.          |
| Flag                      | abs137958      | IP/WB<br>(1:200/1:2,000) | Absin Bioscience, Inc.          |
| Cyclin A                  | ab185619       | WB (1:1,000)             | Abcam                           |
| Cyclin B1                 | ab32053        | WB (1:3,000)             | Abcam                           |
| Cyclin D1                 | 2978           | WB (1:1,000)             | Cell Signaling Technology, Inc. |
| Cyclin D3                 | 2936           | WB (1:2,000)             | Cell Signaling Technology, Inc. |
| Cyclin E1                 | 20808          | WB (1:1,000)             | Cell Signaling Technology, Inc. |
| CDK2                      | 2546           | WB (1:1,000)             | Cell Signaling Technology, Inc. |
| CDK4                      | 12790          | WB (1:1,000)             | Cell Signaling Technology, Inc. |
| CDK6                      | 3136           | WB (1:1,000)             | Cell Signaling Technology, Inc. |
| p27 Kip1<br>(CDKN1B)      | 3686           | WB (1:1,000)             | Cell Signaling Technology, Inc. |
| p21 Waf1/Cip1<br>(CDKN1A) | 2947           | WB (1:1,000)             | Cell Signaling Technology, Inc. |
| P-AKT1/2/3                | ab131443       | WB (1:500)               | Abcam                           |
| AKT1/2/3                  | ab179463       | WB (1:5,000)             | Abcam                           |
| PI3K p110 $\beta$         | 3011           | WB (1:1,000)             | Cell Signaling Technology, Inc. |
| P-PI3K p85                | 4228           | WB (1:1,000)             | Cell Signaling Technology, Inc. |
| PI3K p85                  | 4292           | WB (1:1,000)             | Cell Signaling Technology, Inc. |
| P-GSK3( $\alpha/\beta$ )  | ab68476        | WB (1:1,000)             | Abcam                           |
| GSK3( $\alpha/\beta$ )    | ab62368        | WB (1:1,000)             | Abcam                           |

|                               |        |              |                                 |
|-------------------------------|--------|--------------|---------------------------------|
| FOXO1                         | 2880   | WB (1:1,000) | Cell Signaling Technology, Inc. |
| MTOR                          | 2972   | WB (1:1,000) | Cell Signaling Technology, Inc. |
| E-cadherin                    | 3195   | WB (1:1,000) | Cell Signaling Technology, Inc. |
| Bax                           | 2772   | WB (1:1,000) | Cell Signaling Technology, Inc. |
| Bcl-2                         | 3498   | WB (1:1,000) | Cell Signaling Technology, Inc. |
| Ubiquitin Rabbit<br>mAb       | A19686 | WB (1:2,000) | ABclonal Biotech Co., Ltd.      |
| Phospho-Tyrosine<br>Mouse mAb | 9411   | WB (1:2,000) | Cell Signaling Technology, Inc. |

WB, western blotting.

Table SIII. Primer sequences used for reverse transcription-quantitative PCR.

| Gene name  | Primer sequence (5'-3')      |
|------------|------------------------------|
| E-cadherin | F: AACGTTGTCCCGGGTGTCA       |
|            | R: GGATTGCAAATTCCTGCCATTC    |
| SNAIL      | F: GCTGCAGGACTCTAATCCAGAGTT  |
|            | R: GACAGAGTCCCAGATGAGCATTG   |
| TWIST      | F: GGAGTCCGCAGTCTTACGAG      |
|            | R: TCTGGAGGACCTGGTAGAGG      |
| NOTCH3     | F: TGGCGACCTCACTTACGACT      |
|            | R: CACTGGCAGTTATAGGTGTTGAC   |
| MTOR       | F: TCCGAGAGATGAGTCAAGAGG     |
|            | R: CACCTTCCACTCCTATGAGGC     |
| BCL-2      | F: GGTGGGGTCATGTGTGTGG       |
|            | R: CGG TTCAGGTA CT CAGTCATCC |
| BAX        | F: CCCGAGAGGTCTTTTTCCGAG     |
|            | R: CCAGCCCATGATGGTTCTGAT     |
| CCNA2      | F: GGATGGTAGTTTTGAGTCACCAC   |
|            | R: CACGAGGATAGCTCTCATACTGT   |
| CCNB1      | F: TTGGGGACATTGGTAACAAAGTC   |
|            | R: ATAGGCTCAGGCGAAAGTTTTT    |
| CCND1      | F: GATGCCAACCTCCTCAACGAC     |
|            | R: CTCCTCGCACTTCTGTTCCCTC    |
| CCND3      | F: TACCCGCCATCCATGATCG       |
|            | R: AGGCAGTCCACTTCAGTGC       |
| CCNE1      | F: ACTCAACGTGCAAGCCTCG       |
|            | R: GCTCAAGAAAGTGCTGATCCC     |
| CCNE2      | F: TCAAGACGAAGTAGCCGTTTAC    |
|            | R: TGACATCCTGGGTAGTTTTCCCTC  |
| CCNG2      | F: TCTGTATTAGCCTTGTGCCTTCT   |

|              |                             |
|--------------|-----------------------------|
|              | R: CCTTGAAACGATCCAAACCAAC   |
| CCNH-F       | F: TCACCCCAGGATAATAATGCTCA  |
|              | R: CAGTATCTGTTCAAGTGCCTTCT  |
| CDK1         | F: AA ACTACAGGTCAAGTGGTAGCC |
|              | R: TCCTGCATAAGCACATCCTGA    |
| CDK2         | F: CCAGGAGTTACTTCTATGCCTGA  |
|              | R: TTCATCCAGGGGAGGTACAAC    |
| CDK4         | F: ATGGCTACCTCTCGATATGAGC   |
|              | R: CATTGGGGACTCTCACACTCT    |
| CDK6         | F: CCAGATGGCTCTAACCTCAGT    |
|              | R: AACTTCCACGAAAAAGAGGCTT   |
| CDK7         | F: TGTATGGTGTAGGTGTGGACA    |
|              | R: TGCAAAGGTATTCCAGGGAAAC   |
| PIK3CG       | F: GGC GAAACGCCCATCAAAA     |
|              | R: GACTCCCGTGCAGTCATCC      |
| PDPK1        | F: GGAACAGCGCAGTACGTTTCT    |
|              | R: CTCGTTTCCAGCTCGGAATGG    |
| AKT1         | F: GTCATCGAACGCACCTTCCAT    |
|              | R: AGCTTCAGGTA CTCAA ACTCGT |
| GSK3 $\beta$ | F: GGCAGCATGAAAGTTAGCAGA    |
|              | R: GGCGACCAGTTCTCCTGAATC    |
| FOXO3        | F: CGGACAAACGGCTCACTCT      |
|              | R: GGACCCGCATGAATCGACTAT    |
| CDKN1B       | F: AACGTGCGAGTGTCTAACGG     |
|              | R: CCCTCTAGGGGTTTGTGATTCT   |
| RBL2         | F: CCACCCCTCAGATCCAGCA      |
|              | R: CGTGTAGCTTTCGCTCATGC     |
| PLK1         | F: AAAGAGATCCCGGAGGTCCTA    |
|              | R: GGCTGCGGTGAATGGATATTTC   |

|         |                            |
|---------|----------------------------|
| TP-53   | F: CAGCACATGACGGAGGTTGT    |
|         | R: TCATCCAAATACTCCACACGC   |
| SFN     | F: ACTTTTCCGTCTTCCACTACGA  |
|         | R: ACAGTGT CAGGTTGTCTCGC   |
| GADD45A | F: GAGAGCAGAAGACCGAAAGGA   |
|         | R: CACAACACCACGTTATCGGG    |
| CDKN1A  | F: TGTCCGTCAGAACCCATGC     |
|         | R: AAAGTCGAAGTTCCATCGCTC   |
| CTNNB1  | F: CATCTACACAGTTTGATGCTGCT |
|         | R: GCAGTTTTGTCAGTTCAGGGA   |
| TCF7    | F: TTGATGCTAGGTTCTGGTGTACC |
|         | R: CCTTGGACTCTGCTTGTGTC    |
| LEF1    | F: TGCCAAATATGAATAACGACCCA |
|         | R: GAGAAAAGTGCTCGTCACTGT   |
| APC     | F: AAAATGTCCCTCCGTTCTTATGG |
|         | R: CTGAAGTTGAGCGTAATACCAGT |
| MAPK3   | F: CTACACGCAGTTGCAGTACAT   |
|         | R: CAGCAGGATCTGGATCTCCC    |
| MAPK8   | F: TGTGTGGAATCAAGCACCTTC   |
|         | R: AGGCGTCATCATAAACTCGTTC  |
| ELAVL1  | F: AACTACGTGACCGCGAAGG     |
|         | R: CGCCCAAACCGAGAGAACA     |
| STAT1   | F: ATCAGGCTCAGTCGGGGAATA   |
|         | R: TGGTCTCGTGTTCTCTGTTCT   |
| SMAD2   | F: CGTCCATCTTGCCATTCACG    |
|         | R: CTCAAGCTCATCTAATCGTCCTG |
| RBL1    | F: ACCACCAAAGTTACCACGAAG   |
|         | R: CCCCAATCATCCGAAAATTACCC |
| E2F4    | F: ATCGGGCTAATCGAGAAAAAGTC |

|        |                            |
|--------|----------------------------|
|        | R: TGCTGGTCTAGTTCTTGCTCC   |
| EP300  | F: AGCCAAGCGGCCTAAACTC     |
|        | R: TCACCACCATTGGTTAGTCCC   |
| E2F3   | F: GTATGATACGTCTCTTGGTCTGC |
|        | R: CAAATCCAATACCCCATCGGG   |
| WEE1   | F: AGGGAATTTGATGTGCGACAG   |
|        | R: CTTCAAGCTCATAATCACTGGCT |
| RB1    | F: CTCTCGTCAGGCTTGAGTTTG   |
|        | R: GACATCTCATCTAGGTCAACTGC |
| CDC25C | F: ATGACAATGGAACTTGGTGGAC  |
|        | R: GGAGCGATATAGGCCACTTCTG  |
| GAPDH  | F: GGAGCGAGATCCCTCCAAAAT   |
|        | R: GGCTGTTGTCATACTTCTCATGG |
| PTPN18 | F: AGGAGTCCCGTTCTGTGTACC   |
|        | R: TGCCTCACATAATCCACGGTG   |

F, forward; R, reverse.
